# Supplementary material for: Sarcospan Regulates Cardiac Isoproterenol Response and Prevents Duchenne Muscular Dystrophy–Associated Cardiomyopathy
Source: PubMed Central journal article supplement — J Am Heart Assoc. 2015 Dec 23;4(12):e002481. doi: 10.1161/JAHA.115.002481 (PMC4845268; doi:10.1161/jaha.115.002481), 2015-12-23
Supplement: JAH3-4-e002481-s001.pdf [file JAH3-4-e002481-s001.pdf]

## SUPPLEMENTAL MATERIAL

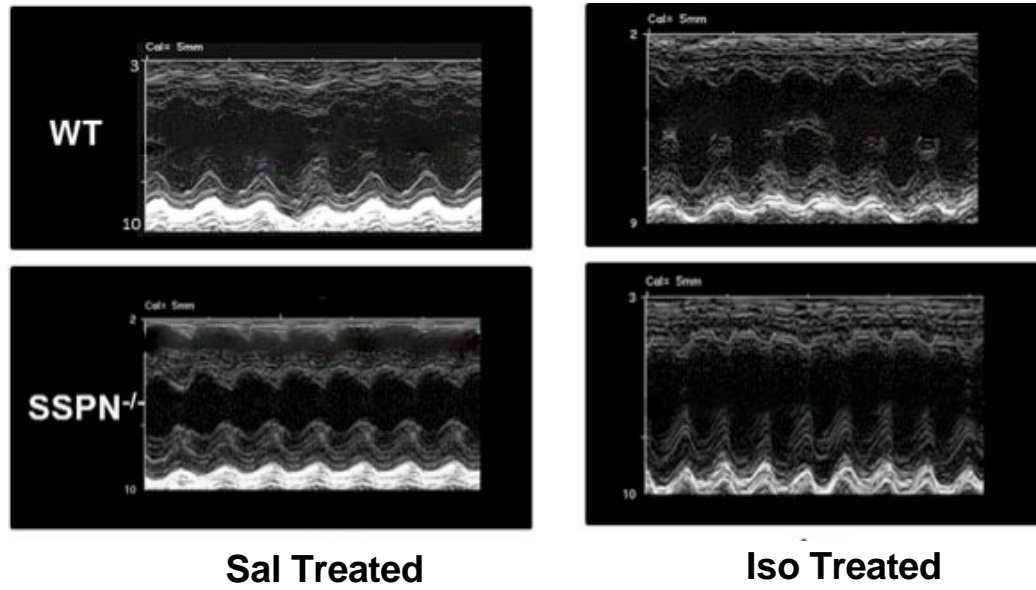

**Figure S1. M-mode images of isoproterenol-treated SSPN-null hearts.** The representative M-mode images show WT (top) and SSPN<sup>-/-</sup> (bottom) mice after  $\beta$ -agonist treatment.

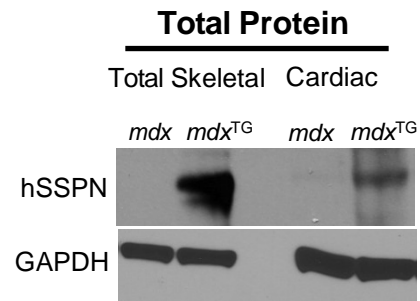

**Figure S2. Expression levels of the SSPN transgene in *mdx* mice.** Total protein samples obtained from total skeletal and cardiac muscle were immunoblotted to determine expression levels of the human SSPN transgene in both tissue types of *mdx* and *mdx*<sup>TG</sup> mice. GAPDH was included as a loading control.
